# Supplementary material for: Yield-based drought tolerance index evaluates the drought tolerance of cotton germplasm lines in the interaction of genotype-by-environment
Source: PeerJ. 2023 Jan 10;11:e14367. doi: 10.7717/peerj.14367 (PMC9838200; doi:10.7717/peerj.14367)
Supplement: Supplemental Information 1 [file peerj-11-14367-s001.xlsx]

## Sheet: Sheet1
Table S1 Temperature and precipitation statistics from 2016 to 2018
Month	2016 year				2017 year				2018 year
	Maximum temperature (℃)	Minimum temperature (℃)	Average temperature (℃)	Average precipitation (mm)	Maximum temperature(℃)	Minimum temperature(℃)	Average temperature(℃)	Average precipitation (mm)	Maximum temperature(℃)	Minimum temperature(℃)	Average temperature(℃)	Average precipitation (mm)
January	4	10	7	12.76	12	7	9.5	2.54	9	4	6.5	4.19
February	6	15	10.5	4.15	13	7	10	11.25	12	5	8.5	1.78
March	11	18	14.5	18.8	16	10	13	14.04	20	12	16	24.94
April	16	23	19.5	54.98	24	15	19.5	37.43	25	15	20	41.08
May	26	18	22	70.32	28	18	23	40.34	27	18	22.5	44.57
June	30	22	26	24.44	28	20	24	29.63	28	21	24.5	12.2
July	31	24	27.5	58.44	32	23	27.5	7.71	30	23	26.5	6.85
August	32	24	28	11.58	30	23	26.5	28.6	31	23	27	12.88
September	25	19	22	13.32	26	20	23	10.65	25	19	22	30.23
October	22	16	19	39.87	17	13	15	13.61	20	14	17	16.08
November	16	10	13	16.21	17	11	14	32.73	15	9	12	12.01
December	13	8	10.5	9.48	12	5	8.5	6.85	10	5	7.5	7.88
