# Supplementary material for: Yield-based drought tolerance index evaluates the drought tolerance of cotton germplasm lines in the interaction of genotype-by-environment
Source: PeerJ. 2023 Jan 10;11:e14367. doi: 10.7717/peerj.14367 (PMC9838200; doi:10.7717/peerj.14367)
Supplement: Supplemental Information 2 [file peerj-11-14367-s002.xlsx]

## Sheet: Table S1
	Table S2 One hundred and three cotton varieties resources
	Bellsno	Liao 58	Xin lu zao 7	YCJ-5
	Big bell cotton	Liao 5856	Xin lu zao 11	Yu 17-202
	Chuan 98	Liao mian 6110	Xin lu zao 13	Zhong 19
	CQJ-2	Lumian 28	Xin lu zao 19	Zhong mian 35
	CQJ-5	Mao shi 3号	Xin lu zao 23	Zhong mian 49
	Da ling wang	MSCO-12	Xin lu zao 24	Zhong mian suo 17
	Duan jie dai	ND359-5	Xin lu zao 26	Zhong mian suo 293
	Fu yi de 998	Qi L5	Xin lu zao 32	Zhong mian suo 50
	Hai 92-4	Shi K8	Xin lu zao 33	Zhong R 2007
	Hong ye mian	Shi nong 98-7	Xin lu zao 35	Zhong R 2015
	Hua xi 3 hao	Shi nong ke suo	Xin lu zao 36	Zhong R 2016
	Ji 197	Shi yang 1 hao	Xin lu zao 38	Zhong R 2067
	Ji 589	Shi yuan 321	Xin lu zao 42	Zhong R 2069
	Ji 668	Shuo feng 1 hao	Xin lu zao 45	Zhong R 2080
	Ji A-17	Ta shi gan 7 hao	Xin lu zao 47	Zhong R 773
	Ji zha 81	Tai yuan 112	Xin lu zao 48	Zhong R 773-1
	Ji zhua miain	Tian he 995	Xin lu zao 49	Zhong R 773-3
	Jin 34	Tian yun 10	Xin lu zao 50	08207-2
	Jin mian 10 hao	Tiao he 2013	Xin lu zao 58	10599
	Jun mian 1 hao	TM-1	Xin lu zhong 3	10615-1
	Ke yang 1 hao	Tu 76-94	Xin lu zhong 8	108 Fu
	KK1543	Xi bu 4	Xin lu zhong 11	2 hao
	Ku che 794	Xi bu 50	Xin lu zhong 39	5917-N10-1
	Ku che C310-5100	Xin hai 20	Xin nong mian 3 hao	806-1
	Kui 85-174	Xin lu zao 1	Xin pao 1 hao	8401
	Liao 18	Xin lu zao 3	Xin shi K7
