# Supplementary material for: Yield-based drought tolerance index evaluates the drought tolerance of cotton germplasm lines in the interaction of genotype-by-environment
Source: PeerJ. 2023 Jan 10;11:e14367. doi: 10.7717/peerj.14367 (PMC9838200; doi:10.7717/peerj.14367)
Supplement: Supplemental Information 3 [file peerj-11-14367-s003.xlsx]

## Sheet: Sheet1
Table S3 Soil water content in drought stress treatments (2016~2018)
Water contents	2016	2017	2018
	In the stress (%)	In the stress (%)	In the stress (%)
0-20cm	60	43	55
20-40cm	62	44	56
40-60cm	61	50	57
Average	61	46	56
