# Supplementary material for: Yield-based drought tolerance index evaluates the drought tolerance of cotton germplasm lines in the interaction of genotype-by-environment
Source: PeerJ. 2023 Jan 10;11:e14367. doi: 10.7717/peerj.14367 (PMC9838200; doi:10.7717/peerj.14367)
Supplement: Supplemental Information 4 [file peerj-11-14367-s004.xlsx]

## Sheet: Sheet1
Table S4 Analysis of variance for cotton plant yield BLUP (2016-2018)
Source of Variation	DF	2016-Yield	2017-Yield	2018-Yield
Genotype (G)	102	225*	310**	111
Treatments (T)	1	53261**	12959**	14739**
G*T	102	192*	170*	55*
2016-Yield: Yield traits in 2016; 2017-Yield: Yield traits in 2017; 2018-Yield: Yield traits in 2018
* Signiûcance at the P < 0.05; level ** Signiûcance at the P < 0.01 level
