# Supplementary material for: Yield-based drought tolerance index evaluates the drought tolerance of cotton germplasm lines in the interaction of genotype-by-environment
Source: PeerJ. 2023 Jan 10;11:e14367. doi: 10.7717/peerj.14367 (PMC9838200; doi:10.7717/peerj.14367)
Supplement: Supplemental Information 5 [file peerj-11-14367-s005.xlsx]

## Sheet: Table S2
Table S5 Results of the principal component analysis of the cotton yield per plant under normal (Yp) and stress (Ys) conditions and seven screening index values.
	Contribution to Variation	Cumulative Percentage	Yp	Ys	STI	MP	GMP	SSI	Yr
PC1	74.74	74.74	0.75	0.88	0.97	0.97	0.99	0.97	-0.24
PC2	22.92	97.66	0.64	-0.46	0.05	0.22	0.08	0.22	0.94
Yp: yield under normal irrigation conditions, Ys: yield under water stress, GMP: geometric mean productivity, MP: mean productivity, STI: stress tolerance index, SSI: stress susceptibility index, Yr: yield reduction ratio
