# Supplementary material for: Yield-based drought tolerance index evaluates the drought tolerance of cotton germplasm lines in the interaction of genotype-by-environment
Source: PeerJ. 2023 Jan 10;11:e14367. doi: 10.7717/peerj.14367 (PMC9838200; doi:10.7717/peerj.14367)
Supplement: Supplemental Information 6 [file peerj-11-14367-s006.xlsx]

## Sheet: Sheet1
Table S6 The linear unbiased prediction (BLUP) value of yield under normal (Yp) and stress treatments (Ys) and the values ofthe eight screening indices for the cotton germplasm
Genotype	Yp (g/plant)	Ys (g/plant)	GMP	MP	STI	SSI	Yr
Bellsno	38.88	25.46	31.24	32.46	0.81	4.94	0.35
Big bell cotton	37.77	20.34	26.07	28.77	0.57	4.37	0.36
Chuan 98	39.21	20.34	28.06	30.84	0.65	4.69	0.37
CQJ-2	37.72	20.74	25.96	28.86	0.57	4.38	0.35
CQJ-5	39.49	26.77	33.22	33.86	0.89	5.16	0.35
Da ling wang	37.1	19.41	24.09	27.37	0.51	4.15	0.35
Duan jie dai	38.92	22.71	29.6	31.39	0.69	4.77	0.36
Fu yi de 998	37.92	22.75	27.9	29.97	0.64	4.55	0.34
Hai 92-4	37.85	19.14	24.8	28.41	0.53	4.31	0.35
Hong ye mian	36.17	20.79	23.19	26.65	0.52	4.04	0.33
Hua xi 3 hao	38.68	24.31	30.17	31.7	0.71	4.82	0.34
Ji 197	38.82	25.5	31.27	32.39	0.78	4.93	0.35
Ji 589	39.26	19.99	27.68	30.77	0.65	4.68	0.37
Ji 668	38.32	22.58	28.17	30.47	0.67	4.63	0.35
Ji A-17	38.39	23.74	29.62	31.04	0.71	4.72	0.35
Ji zha 81	35.8	20	22.36	25.79	0.5	3.91	0.33
Ji zhua miain	36.87	21.57	25.58	27.98	0.58	4.25	0.35
Jin 34	39.58	25.56	32.68	33.53	0.88	5.11	0.35
Jin mian 10 hao	38.35	20.98	26.97	29.86	0.6	4.54	0.36
Jun mian 1 hao	38.52	21.75	28	30.41	0.68	4.62	0.35
Ke yang 1 hao	38.83	23.01	29.5	31.38	0.71	4.77	0.36
KK1543	37.31	23.45	26.81	29.31	0.59	4.45	0.33
Ku che 794	38.55	22.22	28.74	30.66	0.69	4.66	0.36
Ku che C310-5100	38.15	23.66	29.08	30.67	0.68	4.66	0.35
Kui 85-174	38.79	22.07	28.7	30.94	0.67	4.7	0.36
Liao 18	38.12	21.86	27.2	29.9	0.62	4.54	0.35
Liao 58	37.99	23.24	27.53	30.27	0.61	4.6	0.33
Liao 5856	39.32	25.35	32.2	33.05	0.84	5.03	0.35
Liao mian 6110	38.67	22.29	28.79	30.86	0.66	4.69	0.36
Lumian 28	39.33	24.34	31.02	32.64	0.74	4.97	0.35
Mao shi 3 hao	38.82	20.99	28	30.55	0.63	4.64	0.37
MSCO-12	39.13	23.23	30.09	31.9	0.73	4.85	0.36
ND359-5	38.48	28.53	32.18	33.13	0.82	5.04	0.32
Qi L5	37.63	25.6	28.93	30.66	0.7	4.66	0.33
Shi K8	38.64	23.43	29.29	31.28	0.69	4.76	0.35
Shi nong 98-7	38.24	22.21	28.09	30.2	0.64	4.59	0.35
Shi nong ke suo	37.92	21.79	27.17	29.55	0.62	4.49	0.35
Shi yang 1 hao	38.92	22.26	28.42	31.2	0.66	4.75	0.35
Shi yuan 321	39.55	23.93	31.1	32.79	0.79	4.99	0.35
Shuo feng 1 hao	37.29	18.77	22.68	27.43	0.48	4.16	0.33
Ta shi gan 7 hao	38.14	22.87	28.59	30.34	0.65	4.61	0.35
Tai yuan 112	37.39	21.1	26.11	28.52	0.56	4.33	0.35
Tian he 995	37.99	22.57	28.21	30	0.66	4.56	0.35
Tian yun 10	39.11	24.47	31.05	32.39	0.8	4.93	0.35
Tiao he 2013	37.66	26.41	29.77	31.07	0.7	4.72	0.33
TM-1	38.65	23.81	29.5	31.43	0.72	4.78	0.35
Tu 76-94	36.89	25.72	26.21	29.59	0.65	4.5	0.33
Xi bu 4	37.86	24.56	28.49	30.62	0.71	4.65	0.34
Xi bu 50	38.57	18.13	24.46	29.03	0.55	4.41	0.37
Xin hai 20	37.47	21.04	26.16	28.57	0.58	4.34	0.35
Xin lu zao 1	38.26	23.2	28.41	30.64	0.71	4.66	0.35
Xin lu zao 3	38.43	21.48	27.87	30.19	0.64	4.59	0.36
Xin lu zao 7	38.15	20.44	26.6	29.36	0.59	4.46	0.36
Xin lu zao 11	38.5	22.44	28.72	30.67	0.67	4.66	0.35
Xin lu zao 13	37.67	21	26.41	28.86	0.58	4.38	0.35
Xin lu zao 19	38.45	23.39	29.06	30.98	0.67	4.71	0.35
Xin lu zao 23	38.44	21.93	28.33	30.38	0.66	4.62	0.36
Xin lu zao 24	38.37	21.91	28.15	30.27	0.65	4.6	0.36
Xin lu zao 26	37.45	21.22	26.27	28.66	0.57	4.35	0.35
Xin lu zao 32	39.19	23.45	30.65	32.15	0.73	4.89	0.36
Xin lu zao 33	38.05	19.78	26.04	28.94	0.57	4.4	0.36
Xin lu zao 35	38	22.07	27.81	29.78	0.65	4.53	0.35
Xin lu zao 36	38.55	25.31	30.9	31.93	0.75	4.86	0.35
Xin lu zao 38	38.6	21.19	26.79	30.31	0.59	4.61	0.35
Xin lu zao 42	38.31	20.87	27.22	29.75	0.62	4.52	0.36
Xin lu zao 45	40.04	28.31	34.68	35.28	0.97	5.38	0.34
Xin lu zao 47	38.34	20.13	26.45	29.51	0.58	4.48	0.36
Xin lu zao 48	38.54	19.01	25.77	29.36	0.59	4.46	0.36
Xin lu zao 49	38.63	23.59	29.73	31.34	0.69	4.77	0.35
Xin lu zao 50	38.32	21.87	28.12	30.18	0.65	4.59	0.35
Xin lu zao 58	38.4	20.72	27.13	29.82	0.62	4.53	0.36
Xin lu zhong 3	37.87	21	26.49	29.14	0.58	4.43	0.35
Xin lu zhong 8	39.27	22.93	30.15	32.02	0.73	4.87	0.35
Xin lu zhong 11	38.02	22.7	27.74	30.05	0.7	4.57	0.35
Xin lu zhong 39	38.14	20.01	26.31	29.17	0.6	4.43	0.36
Xin nong mian 3	37.36	24.01	27.68	29.68	0.63	4.51	0.33
Xin pao 1 hao	38.43	20.6	26.94	29.83	0.6	4.53	0.36
Xin shi K7	39.46	23.44	30.59	32.46	0.76	4.94	0.36
YCJ-5	38.89	20.48	27.63	30.49	0.62	4.63	0.37
Yu 17-202	36.83	21.69	24.97	27.96	0.56	4.24	0.33
Zhong 19	38.45	24.54	29.88	31.46	0.71	4.78	0.34
Zhong mian 35	38.39	24.63	29.68	31.41	0.7	4.78	0.34
Zhong mian 49	37.39	18.27	23.48	27.33	0.5	4.15	0.36
Zhong mian suo 17	38.53	22.83	28.98	30.87	0.69	4.69	0.36
Zhong mian suo 293	38.57	20.35	27	29.92	0.61	4.55	0.37
Zhong mian suo 50	39.1	23.49	30.17	31.98	0.77	4.87	0.35
Zhong R 2007	37.82	21.76	27.23	29.42	0.61	4.47	0.35
Zhong R 2015	37.1	20.43	25.2	27.78	0.57	4.22	0.35
Zhong R 2016	38.87	26.37	31.77	32.81	0.79	4.99	0.34
Zhong R 2067	37.59	22.83	27.09	29.53	0.59	4.49	0.34
Zhong R 2069	36.65	25.53	27.45	29.27	0.62	4.45	0.3
Zhong R 2080	38.5	22.92	28.43	30.86	0.67	4.69	0.35
Zhong R 773	37.25	20.12	25.2	27.88	0.56	4.23	0.35
Zhong R 773-1	38.94	23.52	30.09	31.75	0.71	4.83	0.36
Zhong R 773-3	37.5	21.07	25.67	28.68	0.56	4.36	0.34
8401	38.99	20.15	26.99	30.44	0.6	4.63	0.36
10599	39.09	23.07	30.06	31.78	0.7	4.84	0.35
08207-2	37.36	24.55	28.15	29.82	0.66	4.53	0.33
10615-1	37.9	22.85	28.03	29.98	0.68	4.56	0.35
108 Fu	37.93	22.67	27.72	29.94	0.63	4.55	0.34
2 hao	38.68	21.94	28.59	30.74	0.66	4.67	0.36
5917-N10-1	39.46	23.88	31.21	32.64	0.77	4.97	0.36
806-1	38.72	24.17	30.21	31.71	0.75	4.82	0.35
